# Supplementary material for: Kidney Outcomes in Transthyretin Amyloid Cardiomyopathy
Source: PubMed Central journal article supplement (PMC11571068; doi:10.1001/jamacardio.2024.4578), 2024-11-17
Supplement: jamacardiol-e244578-s001.pdf [file jamacardiol-e244578-s001.pdf]

## Supplemental Online Content

Ioannou A, Razvi Y, Porcari A, et al. Kidney outcomes in transthyretin amyloid cardiomyopathy. *JAMA Cardiol*. Published online November 17, 2024.  
doi:10.1001/jamacardio.2024.4578

**eAppendix.** eResults

**eFigure.** CONSORT Diagram

**eTable 1.** Chronic Kidney Disease Stage for Patients Diagnosed With ATTR-CM Who Subsequently Experienced Decline in Kidney Function Compared to Those Who Had a Stable Kidney Function at 1-Year

**eTable 2.** Linear Regression Analysis Assessing the Association Between Characteristics and Change in eGFR

**eTable 3.** Multivariable Cox Regression Analysis

**eTable 4.** Univariable Cox Regression Analysis Using the Chronic Kidney Disease Epidemiology Collaboration (CKD-EPI) Formula to Estimate GFR

**eTable 5.** Univariable Cox Regression Analysis Demonstrating the Risk of Mortality Associated With Different Combinations of Markers of ATTR-CM Progression

This supplemental material has been provided by the authors to give readers additional information about their work.

## eAppendix. eResults

There was a reduction in median eGFR from baseline to 1-year in the overall study population (61ml/min/m<sup>2</sup> [50 ml/min/1.73m<sup>2</sup> -77 ml/min/1.73m<sup>2</sup>] vs 55ml/min/m<sup>2</sup>[43 ml/min/1.73m<sup>2</sup> -70 ml/min/1.73m<sup>2</sup>], P<0.001). There was also a significant reduction in median eGFR in patients who did not achieve the threshold used to define decline in kidney function (from 61ml/min/m<sup>2</sup> [50-77] to 59ml/min/m<sup>2</sup> [48 -74], P<0.001), but this was more evident in patients who manifested decline in kidney function (from 63ml/min/m<sup>2</sup> [51 -77] to 43ml/min/m<sup>2</sup> [34-54], P<0.001).

To assess whether decline in kidney function remained independently associated with mortality after adjusting for changes in echocardiographic parameters observed at 1-year an additional multivariable Cox regression analysis was carried out. This adjusted for the following covariates: change in interventricular septal thickness in diastole, change in left ventricular ejection fraction, change in E/e' and change in longitudinal strain. This analysis demonstrated that renal progression remained independently associated with an increased risk of mortality (HR=1.43, 95%CI[1.05-1.94], P=0.023).

To assess whether the year of baseline assessment influenced the prognostic importance of decline in kidney function, the study population was divided into 5 separate cohorts based on the year of the baseline assessment (cohort 1: 2000-2004, cohort 2: 2005-2009, cohort 3: 2010-2014, cohort 4: 2015-2019, cohort 5: 2020-2023). The risk associated with decline in kidney function was consistent across each time period (P for interaction = 0.288). Decline in kidney function also was independently associated with increased risk of mortality after adjusting for the time period in which the baseline assessment was performed (HR=1.72, 95%CI[1.43-2.05], P<0.001).

To assess whether body mass index (BMI) at baseline influenced the prognostic importance of decline in kidney function, the study population was divided into patients who were underweight (BMI <18.5kg/m<sup>2</sup>), normal weight (BMI: 18.5 – 24.9kg/m<sup>2</sup>), overweight (BMI: 25 – 29.9kg/m<sup>2</sup>) and obese (BMI >30kg/m<sup>2</sup>). The risk associated with decline in kidney function was consistent across each BMI category (P for interaction = 0.784).

ATTR-CM disease progression has previously been stratified by assessing the increase in NAC disease stage at 1-year. In the study population, 479 patients demonstrated an increase in NAC disease stage; this was associated with a 1.7-fold increased risk of mortality (HR=1.73, 95%CI[1.46-2.07], P<0.001). In a multivariable analysis adjusting for the increase in NAC disease stage, NT-proBNP progression and decline in kidney function, both NT-proBNP progression and declining kidney function remained independently associated with increased risk of mortality (Increase in NAC disease stage: HR=1.16, 95%CI[0.95-1.42], P=0.154; NT-proBNP progression: HR=1.49, 95%CI[1.23-1.80], P<0.001; decline in kidney function: HR=1.49, 95%CI[1.24-1.80], P<0.001).

Within the study population, 459 patients had measurement of troponin-T both at baseline and at 1 year. Increases in troponin-T was previously defined as an absolute increase >10ng/L and a percentage increase >20%. In the study population, an increase in troponin-T was associated with a 1.7-fold higher risk of mortality (HR=1.66, 95%CI[1.18-2.34], P=0.004) and in a multivariable Cox regression analysis both troponin-T (HR=1.60, 95%CI[1.13-2.26] P=0.008) and decline in kidney function (HR=1.48, 95%CI[1.03-2.14], P=0.036) remained independently associated with mortality.

**eFigure.** CONSORT Diagram

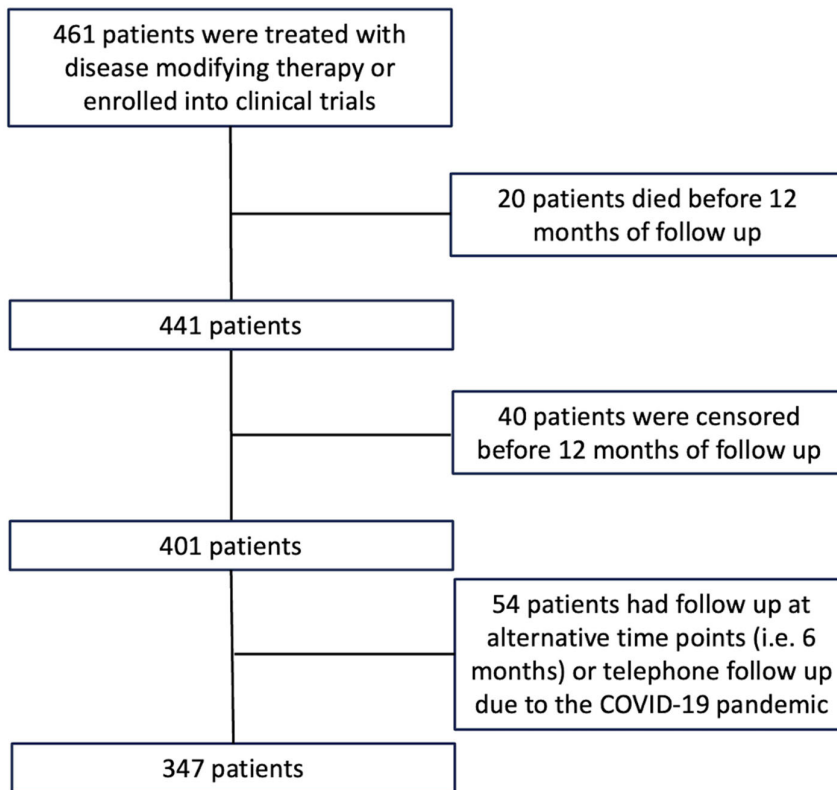

Consort diagram demonstrating which patients who were prescribed ATTR-CM disease modifying therapy or enrolled into clinical trials had a repeat assessment 1-year after their start date.

| Chronic kidney disease stage    | Total population<br>(n = 2001) | Stable kidney<br>function<br>(n = 1520, 76.0%) | Decline in kidney<br>function<br>(n = 481, 24.0%) | P value |
|---------------------------------|--------------------------------|------------------------------------------------|---------------------------------------------------|---------|
| eGFR 60-90ml/min/m <sup>2</sup> | 1076 (53.8%)                   | 808 (53.2%)                                    | 268 (55.7%)                                       | 0.542   |
| eGFR 30-59ml/min/m <sup>2</sup> | 854 (42.7%)                    | 656 (43.2%)                                    | 198 (41.2%)                                       |         |
| eGFR 15-29ml/min/m <sup>2</sup> | 67 (3.4%)                      | 52 (3.4%)                                      | 15 (3.1%)                                         |         |
| eGFR <15ml/min/m <sup>2</sup>   | 4 (0.2%)                       | 4 (0.3%)                                       | 0 (0.0%)                                          |         |

**eTable 1.** Chronic Kidney Disease Stage for Patients Diagnosed With ATTR-CM Who Subsequently Experienced Decline in Kidney Function Compared to Those Who Had a Stable Kidney Function at 1-Year

| eGFR at 1 year                      | Univariable linear regression adjusted for baseline eGFR |         | Multivariable linear regression adjusted for baseline eGFR |         |
|-------------------------------------|----------------------------------------------------------|---------|------------------------------------------------------------|---------|
|                                     | Coefficient (95% CI)                                     | P-value | Coefficient (95% CI)                                       | P-value |
| Age (years)                         | -0.1 (-0.2 to -0.0)                                      | 0.001   | -0.0 (-0.1 to 0.0)                                         | 0.142   |
| Sex (male)                          | 0.2 (-1.1 to 1.6)                                        | 0.719   | -                                                          | -       |
| Diabetes mellitus                   | -1.6 (-2.9 to -0.3)                                      | 0.017   | -0.9 (-2.2 to 0.4)                                         | 0.157   |
| p.(V142I) hATTR-CM                  | -3.4 (-4.7 to -2.2)                                      | <0.001  | -2.4 (-3.7 to -1.1)                                        | <0.001  |
| Log NT-pro-BNP (ng/L)               | -2.4 (-2.9 to -1.9)                                      | <0.001  | -1.8 (-2.3 to -1.2)                                        | <0.001  |
| Haemoglobin (g/L)                   | 0.0 (0.0 to 0.1)                                         | 0.014   | 0.0 (-0.0 to 0.0)                                          | 0.357   |
| Beta-blocker                        | -1.2 (-2.1 to -0.2)                                      | 0.015   | 0.2 (-0.7 to 1.2)                                          | 0.614   |
| ACEi/ARB/ARNI                       | -2.4 (-3.4 to -1.5)                                      | <0.001  | -1.5 (-2.5 to -0.6)                                        | 0.002   |
| MRA                                 | -1.9 (-2.8 to -0.9)                                      | <0.001  | -0.9 (-1.8 to 0.2)                                         | 0.098   |
| Loop diuretics                      | -2.4 (-3.4 to -1.4)                                      | <0.001  | -0.6 (-1.6 to 0.5)                                         | 0.286   |
| NT-proBNP progression               | -3.4 (-4.3 to -2.4)                                      | <0.001  | -2.6 (-3.6 to -1.6)                                        | <0.001  |
| Outpatient diuretic intensification | -3.2 (-4.2 to -2.2)                                      | <0.001  | -2.3 (-3.3 to -1.3)                                        | <0.001  |
| Change in IVSd (mm)                 | 0.0 (-0.3 to 0.4)                                        | 0.816   | -                                                          | -       |
| Change in LVEF (%)                  | 0.0 (-0.0 to 0.1)                                        | 0.227   | -                                                          | -       |
| Change in E/e'                      | 0.1 (-0.0 to 0.1)                                        | 0.131   | -                                                          | -       |
| Change in longitudinal strain (%)   | -0.1 (-0.3 to 0.1)                                       | 0.213   | -                                                          | -       |

**eTable 2.** Linear Regression Analysis Assessing the Association Between Characteristics and Change in eGFR

Linear regression analysis adjusted for the baseline eGFR, whereby each regression coefficient represents the adjusted mean difference in eGFR at 1 year for a unit increase in the variable of interest, followed by a multivariable linear regression analysis, which included the baseline eGFR and all variables with a P<0.10. Outpatient diuretic intensification was defined as any initiation or increment in the dose of loop diuretic.

**eTable 3.** Multivariable Cox Regression Analysis

| Multivariable Cox regression analysis |                    |         |
|---------------------------------------|--------------------|---------|
| Variables                             | HR (95%CI)         | P value |
| Age (years)                           | 1.03 (1.02 – 1.04) | <0.001  |
| Wild-type                             | Ref                |         |
| p.(V142I)                             | 1.77 (1.44 – 2.18) | <0.001  |
| Non-p.(V142I)                         | 1.43 (1.07 – 1.93) | 0.017   |
| NAC stage 1                           | Ref                |         |
| NAC stage 2                           | 2.07 (1.70 – 2.53) | <0.001  |
| NAC stage 3                           | 3.82 (3.02 – 4.84) | <0.001  |
| NYHA class I                          | Ref                |         |
| NYHA class II                         | 1.86 (1.28 – 2.70) | 0.001   |
| NYHA class III                        | 2.26 (1.52 – 3.36) | <0.001  |
| NYHA class IV                         | 2.59 (1.31 – 5.10) | 0.006   |
| Decline in kidney function            | 1.61 (1.35 – 1.94) | <0.001  |

**eTable 4.** Univariable Cox Regression Analysis Using the Chronic Kidney Disease Epidemiology Collaboration (CKD-EPI) Formula to Estimate GFR

| Subgroup                      | HR (95%CI)         | P-value | P for interaction |
|-------------------------------|--------------------|---------|-------------------|
| Overall population            | 1.73 (1.46 – 2.04) | <0.001  | -                 |
| Males                         | 1.72 (1.44 – 2.06) | <0.001  | 0.884             |
| Females                       | 1.79 (1.12 – 2.86) | 0.015   |                   |
| Wild type                     | 1.67 (1.35 – 2.06) | <0.001  | 0.966             |
| p.(V142I)                     | 1.63 (1.17 – 2.28) | 0.004   |                   |
| Non-p.(V142I)                 | 1.56 (0.91 – 2.68) | 0.103   |                   |
| NAC stage 1 disease           | 1.55 (1.15 – 2.10) | 0.004   | 0.862             |
| NAC stage 2 disease           | 1.73 (1.35 – 2.22) | <0.001  |                   |
| NAC stage 3 disease           | 1.62 (1.14 – 2.29) | 0.006   |                   |
| Diabetes                      | 1.65 (1.10 – 2.42) | 0.015   | 0.851             |
| No diabetes                   | 1.72 (1.43 – 2.08) | <0.001  |                   |
| eGFR <60ml/min/m <sup>2</sup> | 1.78 (1.43 – 2.20) | <0.001  | 0.670             |
| eGFR >60ml/min/m <sup>2</sup> | 1.65 (1.26 – 2.16) | <0.001  |                   |

**eTable 5.** Univariable Cox Regression Analysis Demonstrating the Risk of Mortality Associated With Different Combinations of Markers of ATTR-CM Progression

| <b>Risk of mortality associated with different combinations of progression markers</b> |                    |                |
|----------------------------------------------------------------------------------------|--------------------|----------------|
|                                                                                        | <b>HR (95%CI)</b>  | <b>P value</b> |
| Decline in kidney function + NT-proBNP progression vs. Renal progression + ODI         | 0.90 (0.57 – 1.41) | 0.635          |
| Decline in kidney function + ODI vs. NT-proBNP + ODI                                   | 1.29 (0.83 – 1.99) | 0.256          |
| Decline in kidney function + NT-proBNP progression vs. NT-proBNP progression + ODI     | 1.15 (0.78 – 1.69) | 0.471          |
