# Supplementary material for: Kidney Outcomes in Transthyretin Amyloid Cardiomyopathy
Source: PubMed Central journal article supplement (PMC11571068; doi:10.1001/jamacardio.2024.4578), 2024-11-17
Supplement: jamacardiol-e244578-s002.pdf [file jamacardiol-e244578-s002.pdf]

## Data Sharing Statement

Ioannou. Kidney Outcomes in Transthyretin Amyloid Cardiomyopathy. *JAMA Cardiol.*  
Published November 17, 2024. doi:10.1001/jamacardio.2024.4578

### Data

**Data available:** No
